# Supplementary material
Source: PubMed Central journal article supplement (PMC7138024)
Supplement: NIHMS1578270-supplement-Sup_Material.pdf [file NIHMS1578270-supplement-Sup_Material.pdf]

## **Structures and Bioactivities of New Dihydrochalcones from *Metrodorea stipularis***

Marcela Carmen de Melo Burger,<sup>†</sup> João Batista Fernandes,<sup>†</sup> Maria Fátima das Graças Fernandes da Silva,<sup>†</sup> Aster Escalante,<sup>‡</sup> Jacques Prudhomme,<sup>‡</sup> Karine G. Le Roch,<sup>‡</sup> Mario Augusto Izidoro,<sup>§</sup> and Paulo Cezar Vieira.<sup>†,\*</sup>

<sup>†</sup>Departamento de Química, Universidade Federal de São Carlos, Rod. Washington Luís, Km 235, 13565-905 São Carlos, SP, Brazil

<sup>‡</sup>Department of Cell Biology & Neuroscience, University of California Riverside, 900 University Ave, Riverside, CA 92521, USA

<sup>§</sup>Universidade Federal de São Paulo, Rua Pedro de Toledo, 650, 04039-002, São Paulo, SP, Brazil.

### **AUTHOR INFORMATION**

#### **Corresponding Author**

\* Tel/Fax: 55-16-33518350. E-mail: [dpcv@ufscar.br](mailto:dpcv@ufscar.br).



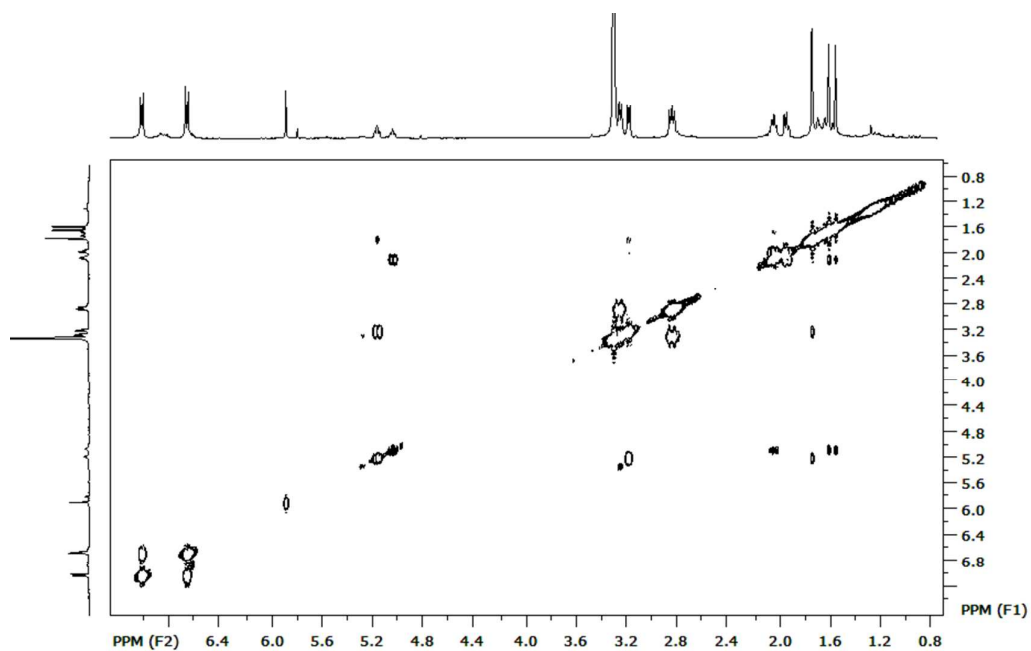

**Figure 2.** COSY (400 MHz, Methanol-d<sub>6</sub>) spectrum of the new compound **1**.

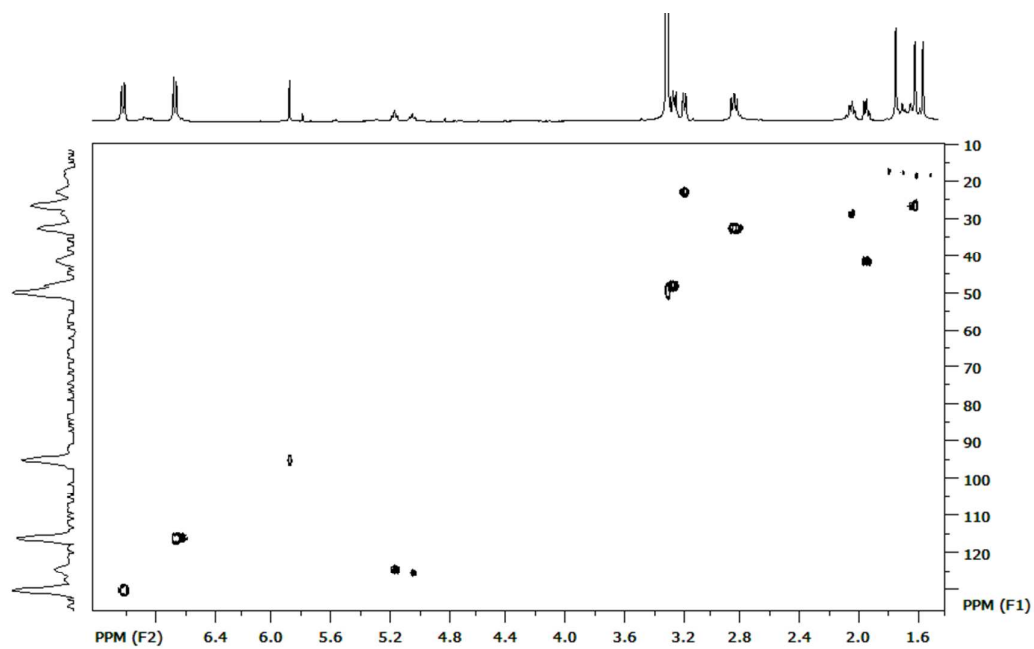

**Figure 3.** HSQC (400 MHz, Methanol-d<sub>6</sub>) spectrum of the new compound **1**.



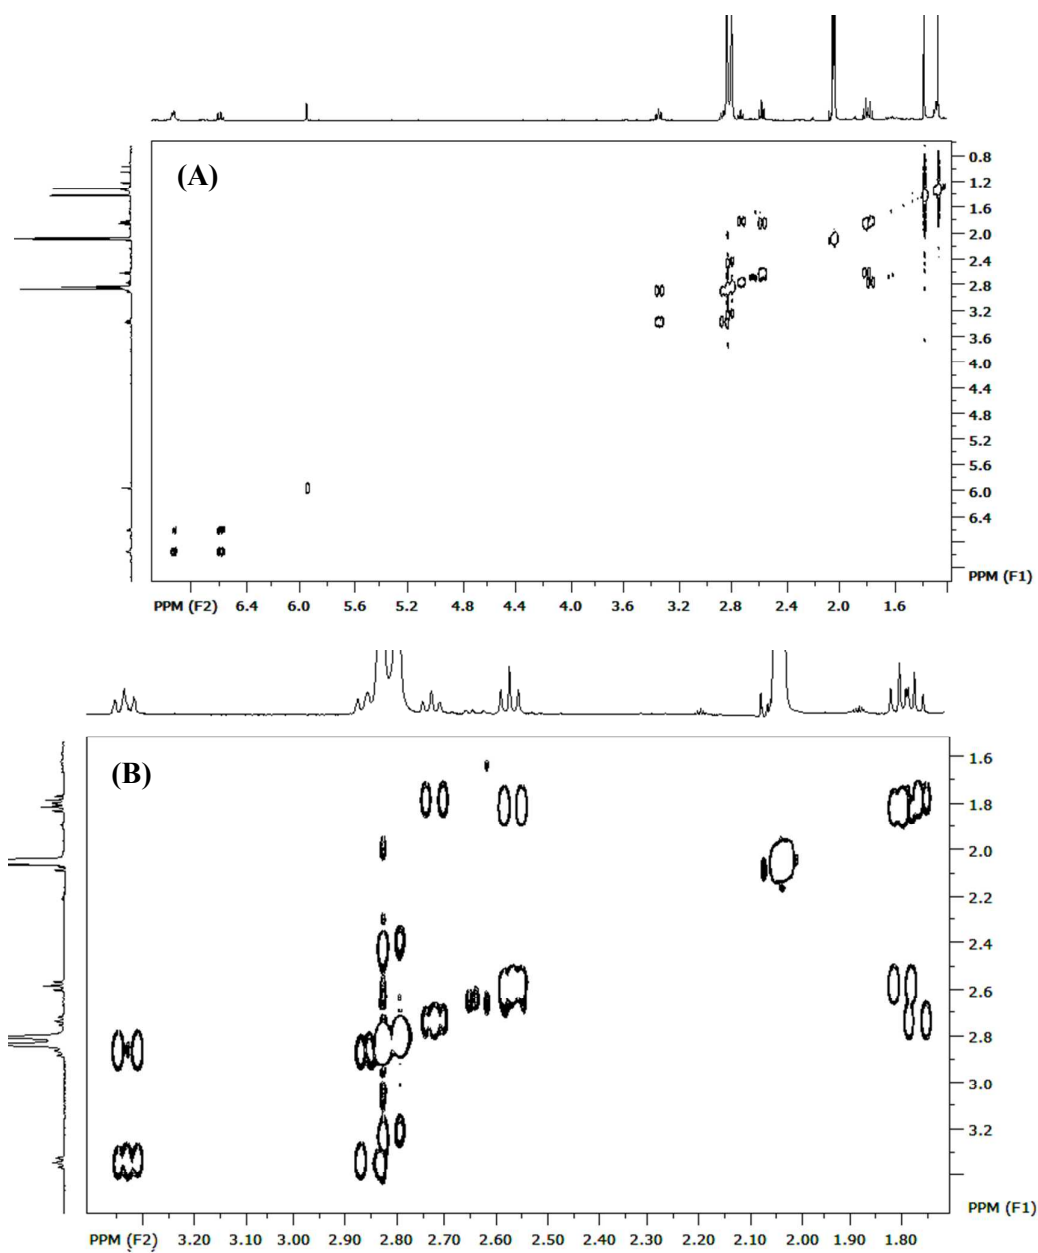

**Figure 6. (A)** COSY (400 MHz, Acetone-d<sub>6</sub>) spectrum of the new compound **2**. **(B)** Expansion of the methyl and methylenic region of the COSY spectrum of the new compound **2**.

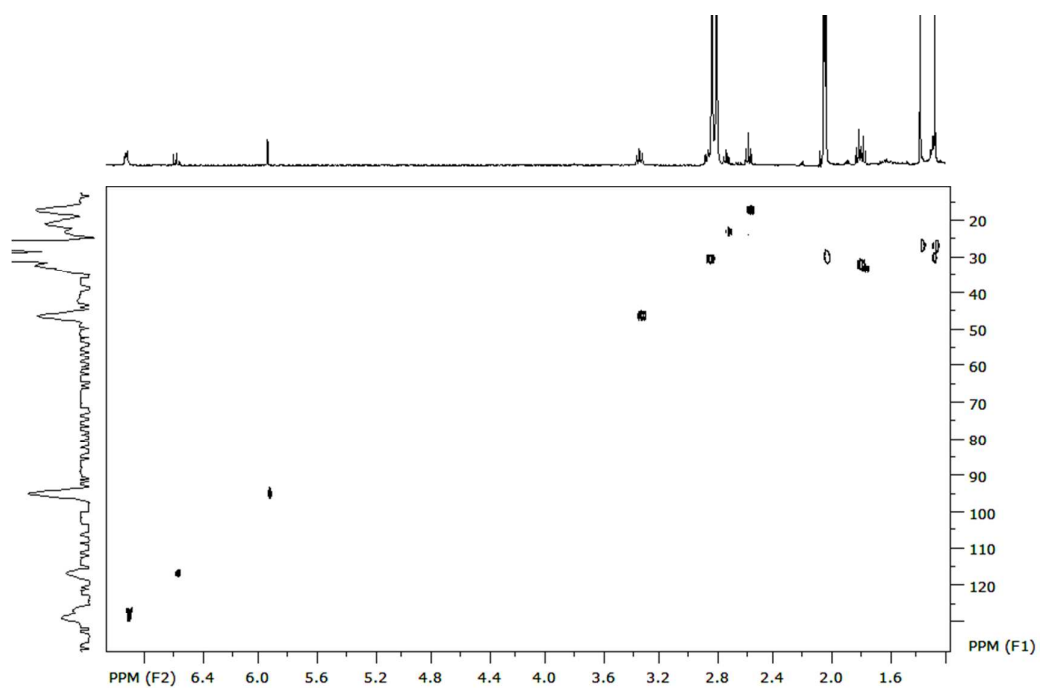

**Figure 7.** HSQC (400 MHz, Acetone-d6) spectrum of the new compound **2**.

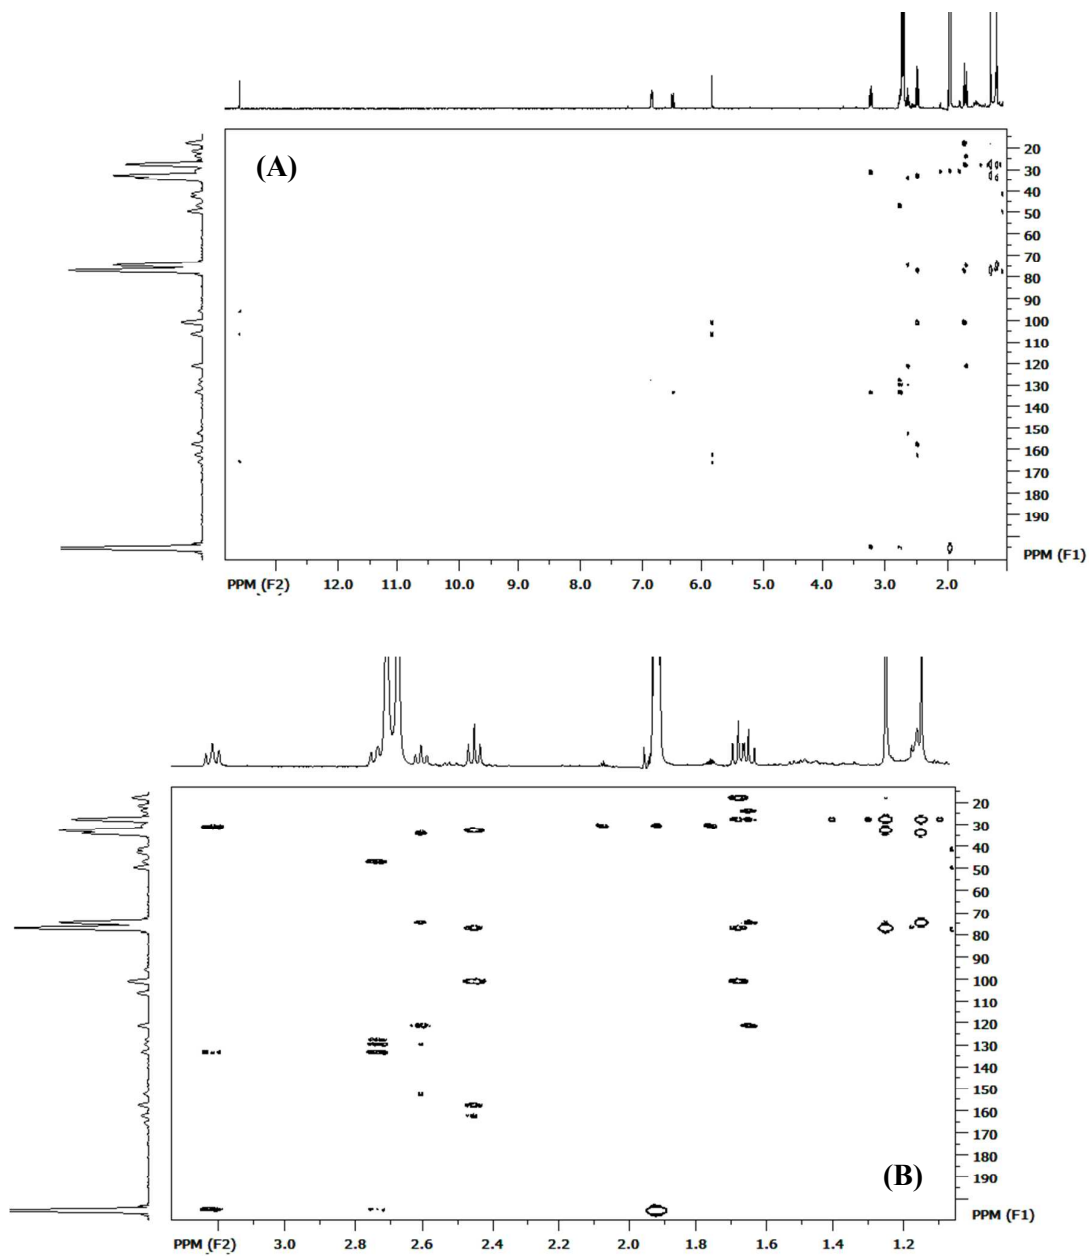

**Figure 8.** (A) HMBC (400 MHz, Acetone-d<sub>6</sub>) spectrum of the new compound **2**. (B) Expansion of the methyl and methylenic region of the HMBC spectrum of the new compound **2**.

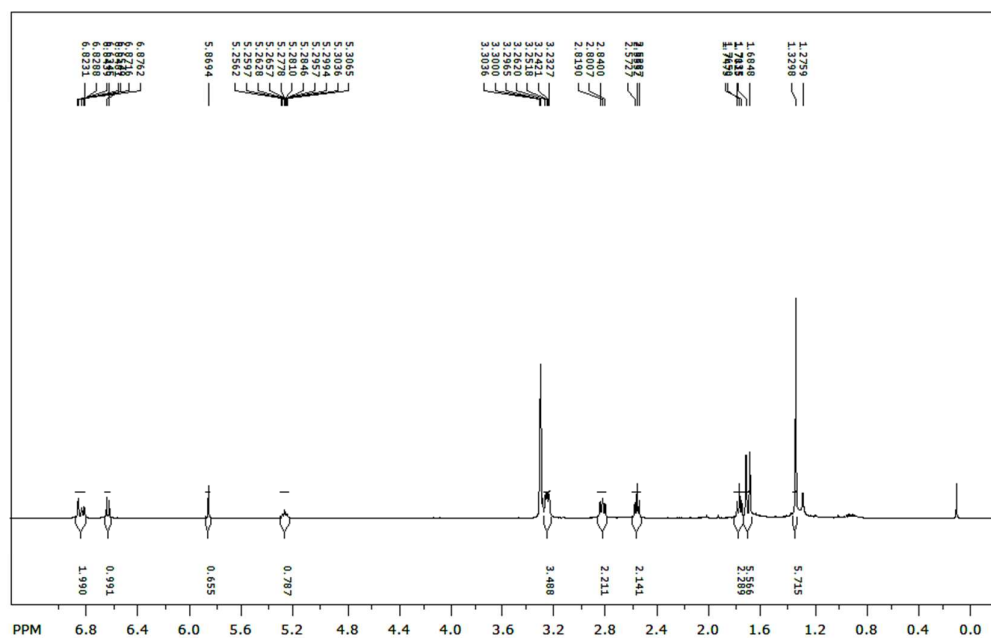

Figure 9.  $^1\text{H}$  NMR (400 MHz, Methanol- $\text{d}_6$ ) spectrum of the new compound **3**.

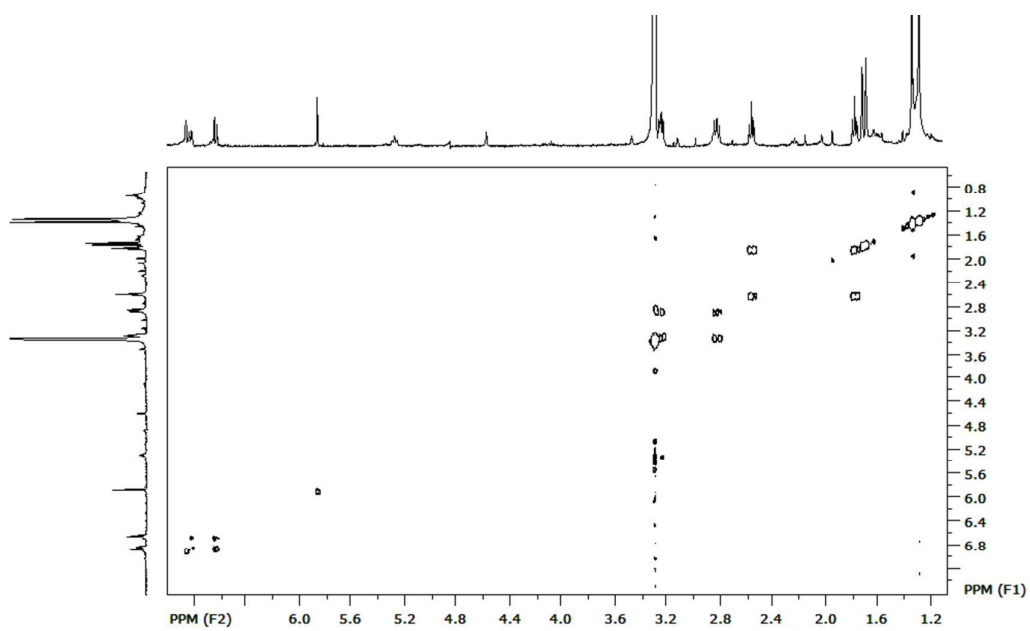

Figure 10. COSY (400 MHz, Methanol- $\text{d}_6$ ) spectrum of the new compound **3**.



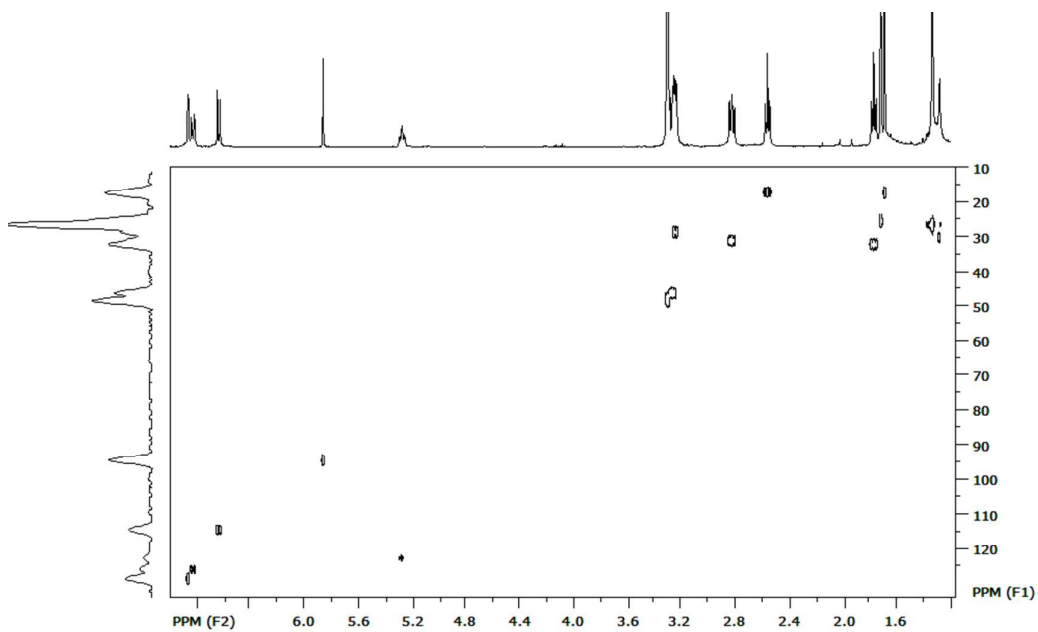

**Figure 11.** HSQC (400 MHz, Methanol- $d_6$ ) spectrum of the new compound **3**.

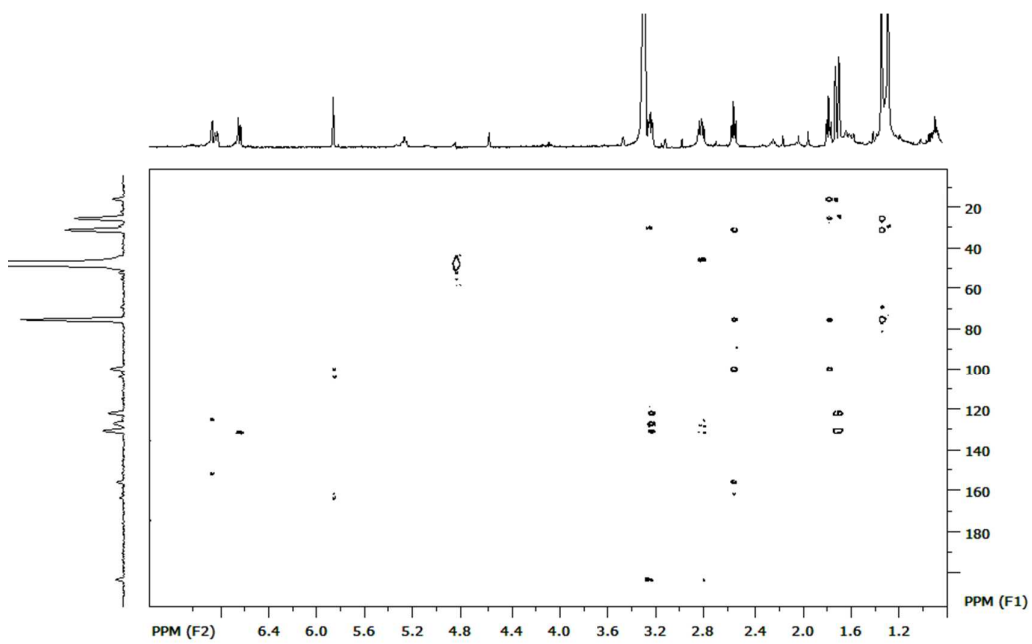

**Figure 12.** HMBC (400 MHz, Methanol- $d_6$ ) spectrum of the new compound **3**.



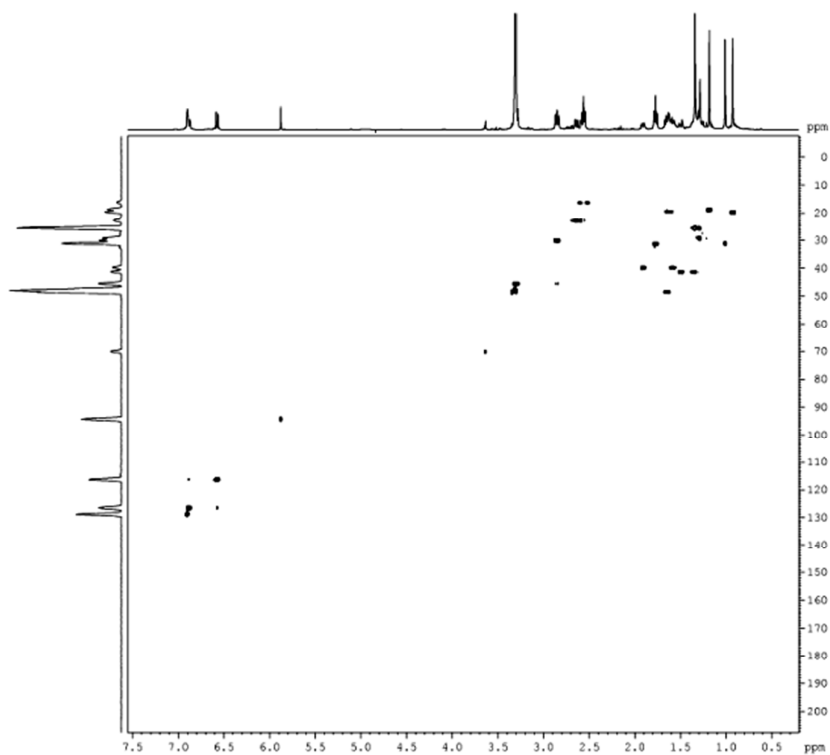

**Figure 15.** HSQC (400 MHz, Methanol-d<sub>6</sub>) spectrum of the new compound **4**.

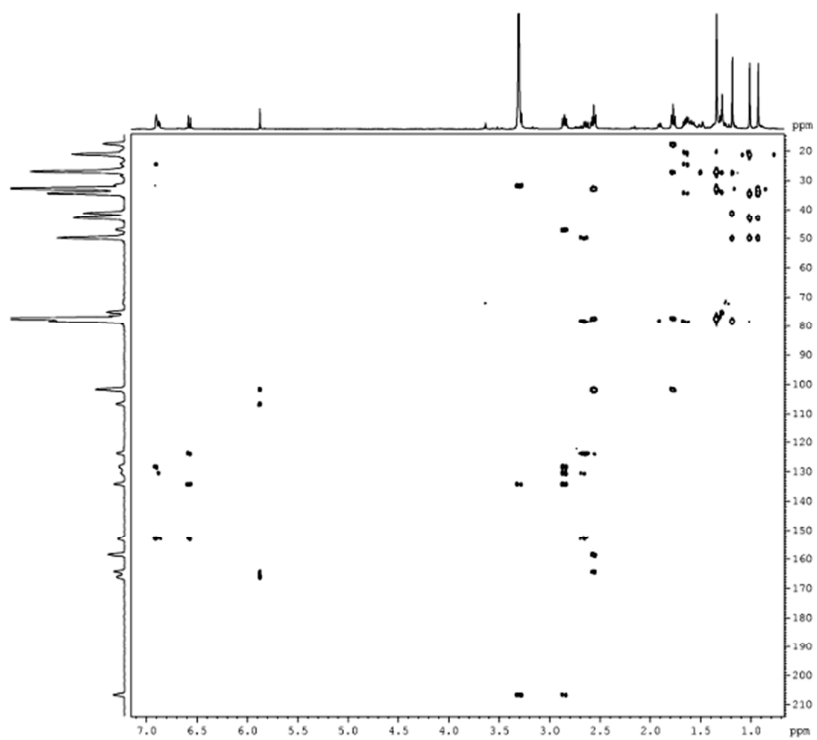

**Figure 16.** HMBC (400 MHz, Methanol-d<sub>6</sub>) spectrum of the new compound **4**.
